# Supplementary material for: Experiences of violence among adolescent girls and young women in Nairobi’s informal settlements prior to scale-up of the DREAMS Partnership: Prevalence, severity and predictors
Source: PLoS One. 2020 Apr 22;15(4):e0231737. doi: 10.1371/journal.pone.0231737 (PMC7176122; doi:10.1371/journal.pone.0231737)
Supplement: S3 Table — (DOCX) [file pone.0231737.s004.docx]

**S3 Table. Factors associated with experience of violence among girls aged 10-14yrsꝉ**

|  | Total | Ever experienced any act of violence n (%) | Model 1 | Model 2 | Model 3 | |
| --- | --- | --- | --- | --- | --- | --- |
| Characteristics | N | Unadjusted OR (95%CI) | Invited, site, and age adjusted OR (95%CI) | Fully adjusted OR (95%CI) | p-value |
| Overall | 606 | 229 (37.8) |  |  |  |  |
|  |  |  |  |  |  |  |
| Invitation to DREAMS |  |  | P=0.011 | P=0.044 | P=0.026 |  |
| Not invited | 316 | 123 (38.9) | 1 | 1 | 1 |  |
| Invited | 290 | 106 (36.6) | 0.66 (0.47-0.91) | 0.71 (0.51-0.99) | 0.68 (0.48-0.95) | 0.026 |
| DSS study site |  |  | P=0.059 | P=0.175 | P=0.087 |  |
| Korogocho | 323 | 125 (38.7) | 1 | 1 | 1 |  |
| Viwandani | 283 | 104 (36.7) | 1.37 (0.99-1.89) | 1.26 (0.9-1.77) | 1.37 (0.96-1.96) | 0.087 |
| Age groups |  |  | P=0.158 | P=0.222 | P=0.126 |  |
| 10-12yr | 372 | 147 (39.5) | 1 | 1 | 1 |  |
| 13-14yr | 234 | 82 (35.0) | 0.79 (0.57-1.1) | 0.81 (0.58-1.13) | 0.77 (0.54-1.08) | 0.126 |
| Currently enrolled in school? |  |  | P=0.907 | P=0.903 |  |  |
| No | 5 | 2 (40.0) | 1 | 1 |  |  |
| Yes | 601 | 227 (37.8) | 0.9 (0.15-5.42) | 0.89 (0.15-5.48) |  |  |
| School grade |  |  | P=0.172 | P=0.242 |  |  |
| Upper primary or Secondary | 257 | 87 (33.9) | 1 | 1 |  |  |
| Middle primary | 311 | 127 (40.8) | 1.35 (0.97-1.89) | 1.39 (0.91-2.12) |  |  |
| Lower primary | 38 | 15 (39.5) | 0.96 (0.48-1.9) | 0.99 (0.47-2.11) |  |  |
| School type |  |  | P=0.172 | P=0.165 |  |  |
| Public school | 271 | 108 (39.9) | 1 | 1 |  |  |
| Private, non-religious or secular school | 260 | 88 (33.8) | 0.74 (0.52-1.04) | 0.77 (0.54-1.09) |  |  |
| Religious school | 70 | 31 (44.3) | 1.04 (0.61-1.78) | 1.20 (0.68-2.11) |  |  |
| Not enrolled in school | 5 | 3 (60.0) |  |  |  |  |
| Gender of teachers |  |  | P=0.193 | P=0.325 |  |  |
| Mostly women (very few or no men) | 162 | 52 (32.1) | 1 | 1 |  |  |
| Mostly men (very few or no women) | 58 | 22 (37.9) | 1.14 (0.63-2.09) | 1.21 (0.66-2.22) |  |  |
| Both men and women | 381 | 153 (40.2) | 1.40 (0.97-2.03) | 1.33 (0.92-1.95) |  |  |
| Not enrolled in school | 5 | 3 (60) |  |  |  |  |
| Religion |  |  | P=0.049 | P=0.074 | P=0.120 |  |
| Christian | 534 | 207 (38.8) | 1 | 1 | 1 |  |
| Muslim | 61 | 18 (29.5) | 0.51 (0.3-0.88) | 0.54 (0.31-0.93) | 0.57 (0.32-0.99) | 0.045 |
| Other | 11 | 4 (36.4) | 0.83 (0.25-2.75) | 0.72 (0.21-2.42) | 0.72 (0.2-2.51) | 0.602 |
| Ethnic group |  |  | P=0.0621 | P=0.145 |  |  |
| Somali | 56 | 17 (30.4) | 1 | 1 |  |  |
| Kamba | 96 | 37 (38.5) | 1.79 (0.92-3.48) | 1.64 (0.81-3.32) |  |  |
| Kikuyu | 195 | 71 (36.4) | 1.79 (0.92-3.48) | 1.64 (0.81-3.32) |  |  |
| Kisii | 34 | 12 (35.3) | 1.56 (0.85-2.83) | 1.53 (0.83-2.83) |  |  |
| Luhya | 91 | 38 (41.8) | 3.7 (1.46-9.37) | 2.92 (1.1-7.76) |  |  |
| Luo | 115 | 48 (41.7) | 2.58 (1.3-5.12) | 2.49 (1.24-4.98) |  |  |
| Other | 19 | 6 (31.6) | 1.93 (1.01-3.68) | 1.95 (1.02-3.75) |  |  |
| Activities for payment past 6 months |  |  | P=0.019 | P=0.013 | P=0.017 |  |
| no | 577 | 212 (36.7) | 1 | 1 | 1 |  |
| yes | 29 | 17 (58.6) | 2.97 (1.19-7.41) | 3.19 (1.27-7.99) | 3.09 (1.23-7.77) | 0.017 |
| Ever had sex |  |  |  |  |  |  |
| no | 594 | 220 (37.0) | 1 |  |  |  |
| yes | 12 | 9 (75.0) | *__* |  |  |  |
| Family did not have enough food due to money | |  | P=0.018 | P=0.002 | P=0.003 |  |
| no | 228 | 75 (32.9) | 1 | 1 | 1 |  |
| yes | 378 | 154 (40.7) | 1.49 (1.07-2.08) | 1.73 (1.22-2.46) | 1.69 (1.19-2.41) | 0.003 |

*__* The model could not run for ‘ever had sex’ explanatory variable because of separation problem. ꝉThe binary outcome here is whether the girl had ever experienced any act of violence. Model 1 is unadjusted logit model; Model 2 is invited to DREAMS, site, and age adjusted logit model for each predictor; Model 3 is fully adjusted multivariable logit model. Variables significant at P<0.10 in model 2 were included in model 3. Invited to DREAMS, site, and age were included even if they were not significant as we wished to adjust for their impact. The capital P is likelihood ratio rest (LRT) p-value
